# Supplementary material for: Development of biocontrol agents for cotton verticillium wilt using microbiome analysis
Source: Research Square preprint supplement (doi:10.21203/rs.3.rs-6884856/v1), 2025-06-18
Supplement: Supplementary file 1 [file 1f3dcc3e3e8e961c84cd7b67.docx]

**
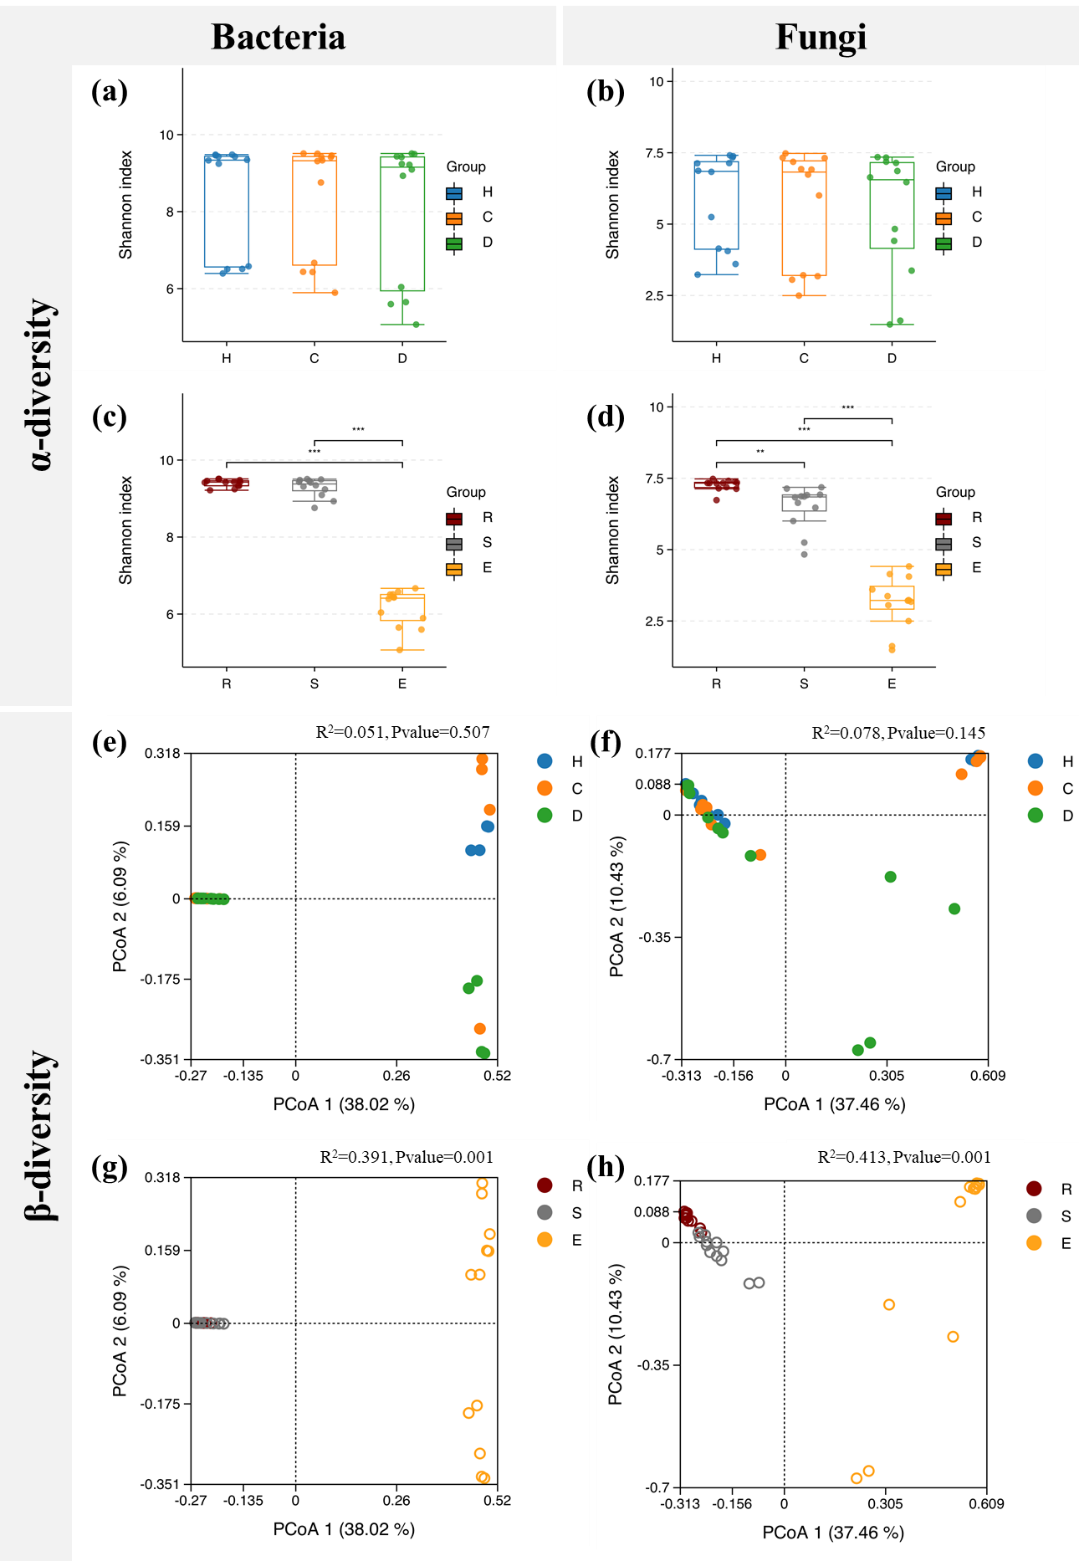
**

Figure S1 Bacterial and fungal α-diversity (A-D) and β-diversity (E-H) in different treatments. Principal coordinates analysis (PCoA) and permutational multivariate analysis of variance (PERMANOVA) of bacterial (E, G) and fungal (F, H) β-diversity based on Bray-Curtis distance. C, Control group; H, Healthy group; D, Disease group; E, endogenous; R, rhizosphere; S, bulk soil. Asterisks indicate statistically significant (**P* < 0.05; ***P* < 0.01; ****P* < 0.001) differences based on analysis of variance with Student’s T multiple comparison test.


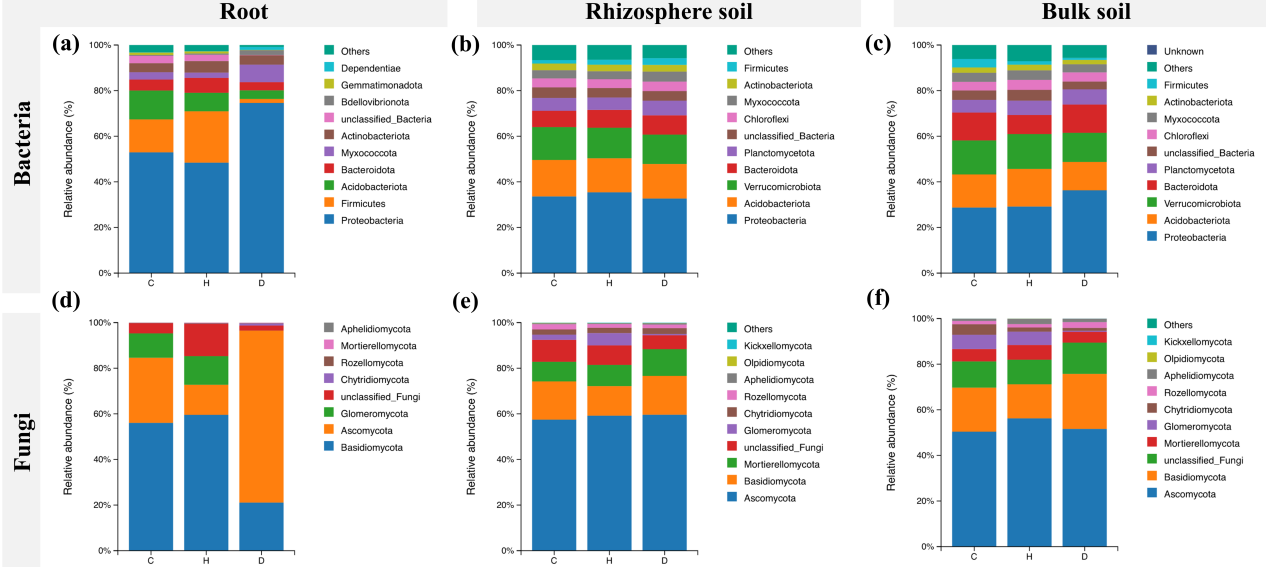


Fig. S2 The relative abundance of bacteria (a-c) and fungi (d-f) in root (a, d), rhizosphere soil (b, e) and bulk soil (c, f) at the phylum level. C, control group; H, healthy group; D, diseased group.
