# Supplementary material for: Development of biocontrol agents for cotton verticillium wilt using microbiome analysis
Source: Research Square preprint supplement (doi:10.21203/rs.3.rs-6884856/v1), 2025-06-18
Supplement: Supplementary file 2 [file 4ccbd4f62335002b223885f3.xlsx]

## Sheet: a-Root-bacteria
genus	C	H	D
Allorhizobium_Neorhizobium_Pararhizobium_Rhizobium	0.00996788	0.0211087	0.103242
uncultured_Mollicutes_bacterium	0.0545824	0.0598985	0
Candidatus_Solibacter	0.0528266	0.0390565	0.0198324
unclassified_Xanthobacteraceae	0.035985	0.0275588	0.0186928
Pseudomonas	0.028394	0.011715	0.0381392
unclassified_Comamonadaceae	0.0180942	0.0106877	0.0418336
Acidibacter	0.0302463	0.0224027	0.0150535
unclassified_Elsterales	0.0404818	0.0198443	0.00358416
unclassified_Bacteria	0.0321842	0.0273711	0.00180127
Bryobacter	0.0328801	0.0193109	0.00481565
Others	0.664358	0.741046	0.753005

## Sheet: b-Rhizoshpere-bacteria
genus	C	H	D
Candidatus_Udaeobacter	0.0919343	0.08375	0.0766672
unclassified_Vicinamibacterales	0.0484724	0.043491	0.0508826
unclassified_Bacteria	0.0461527	0.041657	0.0422479
unclassified_Comamonadaceae	0.0278116	0.0297746	0.0184278
Bradyrhizobium	0.023964	0.0253359	0.0251457
unclassified_Xanthobacteraceae	0.0233207	0.0203894	0.024656
unclassified_Acidobacteriales	0.0192999	0.0193917	0.0198968
uncultured_proteobacterium	0.0182792	0.0164883	0.0166961
unclassified_Micropepsaceae	0.0147842	0.0147618	0.0194251
unclassified_Chitinophagaceae	0.0169307	0.0168587	0.0133999
Others	0.66905	0.688102	0.692555

## Sheet: c-Bluk soil-bacteria
genus	C	H	D
Candidatus_Udaeobacter	0.0800348	0.0937116	0.0652066
unclassified_Vicinamibacterales	0.0471047	0.0523675	0.0412732
unclassified_Bacteria	0.0409206	0.0473882	0.0345726
unclassified_Comamonadaceae	0.022387	0.0197294	0.0399393
Bradyrhizobium	0.0204942	0.0193474	0.0228827
unclassified_Xanthobacteraceae	0.0208765	0.02355	0.0146281
unclassified_Acidobacteriales	0.0185459	0.0208192	0.0162702
unclassified_Microscillaceae	0.0137245	0.0107917	0.0263557
unclassified_Chitinophagaceae	0.0148343	0.0184454	0.016201
unclassified_Micropepsaceae	0.0170107	0.0155393	0.0168679
Others	0.704067	0.67831	0.705004
Unknown	0	0	0.000799039

## Sheet: d-Root-fungi
genus	C	H	D
unclassified_Basidiomycota	0.557193	0.590056	0.132916
Verticillium	0.00306901	0.000133526	0.501103
Ilyonectria	0.230861	0.0419186	0.00667852
unclassified_Fungi	0.0446552	0.14208	0.0220132
unclassified_Sordariomycetes	0.00725123	0.00827804	0.0804057
Fusarium	0.00305615	0.00403602	0.0774915
unclassified_Ascomycota	0.00837114	0.0125223	0.0335637
unclassified_Glomeromycota	0.0265157	0.0199684	0
Rhizophagus	0.0132193	0.0314619	0.00010313
unclassified_Glomeraceae	0.0242826	0.00976223	0
Others	0.0467944	0.0668235	0.109219
unidentified	0.0347314	0.0729594	0.0365069

## Sheet: e-Rhizoshpere-fungi
genus	C	H	D
Mortierella	0.085845	0.0930041	0.11719
unclassified_Fungi	0.096149	0.0853237	0.0608188
Fusarium	0.0597654	0.0691433	0.0734992
Penicillium	0.0917364	0.0413253	0.0377842
Cladosporium	0.0517237	0.0478911	0.054583
unclassified_Basidiomycota	0.0315194	0.0378445	0.0230145
Plectosphaerella	0.0239893	0.028343	0.0297324
unclassified_Ascomycota	0.0245688	0.0216722	0.027631
Hygrocybe	0.0350047	0.0114923	0.00866658
Archaeospora	0.00775795	0.0413818	0.0019085
Others	0.419645	0.462816	0.506041
unidentified	0.0722956	0.059763	0.0591313

## Sheet: f-Bluk soil-fungi
genus	C	H	D
unclassified_Fungi	0.115022	0.107588	0.136974
unclassified_Ascomycota	0.0854891	0.0647406	0.0409
unclassified_Agaricomycetes	0.0273592	0.00584324	0.132846
Mortierella	0.053797	0.0632837	0.0472934
Fusarium	0.0304923	0.0494002	0.058953
Penicillium	0.0599842	0.025043	0.0464491
unclassified_Basidiomycota	0.0508369	0.0414529	0.0269902
Hygrocybe	0.0383533	0.039438	0.0312524
Archaeorhizomyces	0.027521	0.0329167	0.0373519
Cladosporium	0.0302591	0.0361018	0.0277824
Others	0.388976	0.463728	0.349795
unidentified	0.0919096	0.0704637	0.0634124
