# Supplementary material for: Development of biocontrol agents for cotton verticillium wilt using microbiome analysis
Source: Research Square preprint supplement (doi:10.21203/rs.3.rs-6884856/v1), 2025-06-18
Supplement: Supplementary file 3 [file 6222228d6b1d37150a48c71c.xlsx]

## Sheet: g-Root-bacteria
sample	group	PC1	PC2	PC3	PC4	PC5	PC6	PC7	PC8	PC9	PC10	PC11	PC12
EB10	H	0.158	0.2105	-0.0885	-0.0638	0.0084	0.3392	-0.18	0.1741	0.3746	0.1376	-0.1108	0
EB11	H	0.14	0.0214	0.2605	-0.5006	0.2803	-0.1698	-0.009	0.013	-0.013	-0.085	0.0138	0
EB12	H	0.1197	-0.0084	-0.191	-0.2244	-0.5372	-0.0739	-0.012	0.0513	-0.062	-0.1689	0.1177	0
EB9	H	0.1492	0.1305	-0.3412	-0.0415	0.1223	0.0494	0.1959	-0.4107	-0.1427	0.1407	-0.1069	0
EB1	C	0.1634	-0.1802	0.0228	0.1173	0.1105	0.2971	0.2847	0.308	-0.2624	-0.1153	-0.0004	0
EB2	C	0.2662	-0.1546	0.1447	0.2354	0.0161	0.0201	-0.4571	-0.179	-0.1663	-0.0578	0.015	0
EB3	C	-0.282	-0.2665	-0.0632	0.0418	0.1009	0.1105	0.0603	-0.207	0.3041	-0.3226	0.1154	0
EB4	C	0.2508	-0.1607	0.0495	0.2337	-0.0264	-0.3799	0.206	0.0752	0.2627	0.1852	0.021	0
EB5	D	-0.3185	-0.1906	0.1361	-0.1068	-0.0957	0.1273	-0.0201	-0.0331	-0.0927	0.4313	0.2032	0
EB6	D	-0.1614	0.3142	0.4103	0.1422	-0.2037	0.0333	0.1589	-0.1286	-0.0173	-0.0856	-0.2136	0
EB7	D	-0.3213	-0.1128	-0.2072	-0.0053	0.0525	-0.2045	-0.1546	0.1919	-0.1001	0.0002	-0.3954	0
EB8	D	-0.1641	0.3974	-0.1328	0.1718	0.1722	-0.1486	-0.073	0.1448	-0.0849	-0.0598	0.3411	0

## Sheet: h-Rhizosphere-bacteria-
sample	group	PC1	PC2	PC3	PC4	PC5	PC6	PC7	PC8	PC9	PC10	PC11	PC12
RB10	H	0.0003	-0.0448	-0.0131	0.099	-0.1242	-0.0395	-0.0932	-0.022	-0.0707	-0.0231	0.0763	0
RB11	H	-0.1951	0.0597	-0.0684	-0.13	-0.0335	-0.0024	-0.0799	0.096	0.0524	-0.0136	-0.0029	0
RB12	H	-0.194	0.0058	-0.0526	-0.1053	-0.039	0.0645	0.0875	-0.0944	-0.0559	0.0091	0.0046	0
RB9	H	0.0167	-0.0342	-0.0473	0.1206	-0.1431	-0.0228	0.0689	0.0187	0.054	0.0137	-0.0857	0
RB1	C	-0.0817	0.1004	0.0499	0.0819	0.0904	-0.0596	0.0251	-0.0257	0.0072	-0.1265	-0.0169	0
RB2	C	-0.0677	0.1398	0.0131	0.0836	0.0767	-0.0673	-0.0096	-0.0148	-0.0024	0.1252	0.0118	0
RB3	C	-0.0292	-0.1303	0.0697	0.0278	0.0724	0.0812	-0.1034	-0.0403	-0.008	0.0139	-0.085	0
RB4	C	-0.0304	-0.0754	0.047	0.094	0.0522	0.1128	0.0664	0.0866	0.0162	0.0038	0.0767	0
RB5	D	0.1569	-0.0522	-0.1511	-0.0335	0.0507	-0.0063	-0.0134	-0.0769	0.0954	-0.0058	0.0489	0
RB6	D	0.1686	-0.0107	-0.1403	-0.0428	0.0668	-0.0251	0.0234	0.0709	-0.101	-0.0055	-0.0385	0
RB7	D	0.2206	0.1803	0.1228	-0.0674	-0.0657	0.0822	-0.0117	-0.0081	0.0042	-0.0051	-0.0031	0
RB8	D	0.0351	-0.1384	0.1702	-0.1278	-0.0038	-0.1177	0.0401	0.0101	0.0086	0.0141	0.0139	0

## Sheet: i-Bulk soil-bacteria
sample	group	PC1	PC2	PC3	PC4	PC5	PC6	PC7	PC8	PC9	PC10	PC11	PC12
SB10	H	-0.127	-0.0093	0.0105	-0.0407	0.1648	-0.1527	0.0053	-0.019	0.0123	-0.0776	0.0067	0
SB11	H	-0.1344	-0.0547	0.0046	-0.039	-0.0874	0.0397	-0.0292	0.0482	0.161	-0.0542	-0.0334	0
SB12	H	-0.1213	-0.0515	-0.0429	-0.0192	0.1275	0.1887	-0.0024	-0.0399	-0.0408	-0.0213	-0.0071	0
SB9	H	-0.1211	-0.0516	0.0277	-0.0466	-0.0111	-0.043	-0.0874	0.0474	-0.0633	0.1048	-0.1064	0
SB1	C	-0.0827	0.3554	-0.0214	0.0352	-0.0238	0.0132	-0.0159	0.0054	-0.0074	-0.0026	-0.0011	0
SB2	C	-0.1208	-0.0328	0.0004	-0.03	0.0025	-0.0111	0.0378	0.0121	0.0343	0.1234	0.1328	0
SB3	C	-0.0733	-0.0303	0.036	-0.0079	-0.1	-0.0173	0.184	-0.0771	-0.0372	-0.008	-0.0488	0
SB4	C	0.0057	-0.0844	-0.0999	0.2708	-0.0179	-0.0278	-0.0306	-0.0114	-0.0023	-0.0029	0.0028	0
SB5	D	0.0061	-0.0517	0.095	-0.0336	-0.1083	0.0039	-0.0689	0.0386	-0.103	-0.0911	0.0751	0
SB6	D	0.2687	0.0166	0.2272	0.0648	0.0736	0.0289	0.0274	0.0342	0.0356	0.0216	-0.0159	0
SB7	D	0.2445	-0.0005	-0.0545	-0.0819	-0.0338	-0.0171	-0.0856	-0.154	0.0294	0.0184	0.0025	0
SB8	D	0.2556	-0.0053	-0.1828	-0.072	0.0139	-0.0054	0.0655	0.1155	-0.0185	-0.0104	-0.0071	0

## Sheet: j-Root-fungi
sample	group	PC1	PC2	PC3	PC4	PC5	PC6	PC7	PC8	PC9	PC10	PC11	PC12
EF10	H	-0.2355	0.0465	-0.1644	0.0436	-0.0021	-0.0663	0.066	0.1185	-0.0144	0.0338	-0.0091	0
EF11	H	-0.2168	0.0218	-0.1323	-0.0395	0.0749	0.1877	0.1103	-0.0327	0.012	-0.0044	0.0053	0
EF12	H	-0.2243	0.0324	-0.0599	-0.0004	-0.0001	0.1094	-0.1732	0.025	-0.0146	0.0233	0.017	0
EF9	H	-0.2183	0.0446	-0.0927	-0.2073	-0.195	-0.0567	0.0062	-0.0323	-0.0024	-0.01	0.0016	0
EF1	C	-0.1687	0.0222	0.3886	-0.0165	0.0055	-0.0141	0.0433	0.0214	-0.0052	0.0048	0.0469	0
EF2	C	-0.2182	0.0527	0.2423	0.0317	-0.0296	0.0414	-0.0157	0.0065	0.0159	-0.0131	-0.0666	0
EF3	C	-0.2364	0.0425	-0.0363	0.139	0.0224	-0.0809	0.0089	-0.1001	-0.0502	0.0359	-0.0032	0
EF4	C	-0.2333	0.0437	-0.1091	0.1272	0.0172	-0.0704	-0.0262	-0.0036	0.0625	-0.0655	0.0176	0
EF5	D	0.1863	-0.6139	-0.0073	0.0093	-0.0117	-0.004	-0.0011	0.0005	0.0013	0.0005	-0.0026	0
EF6	D	0.6937	0.125	-0.0185	0.0672	-0.0657	0.0441	0.0119	0.0176	-0.0646	-0.0452	0.0024	0
EF7	D	0.2106	0.0551	-0.0098	-0.1701	0.2153	-0.0847	-0.0307	-0.0028	-0.0131	-0.0136	-0.011	0
EF8	D	0.6609	0.1274	-0.0007	0.0159	-0.0312	-0.0055	0.0004	-0.0179	0.0727	0.0535	0.0016	0

## Sheet: k-Rhizosphere-fungi
sample	group	PC1	PC2	PC3	PC4	PC5	PC6	PC7	PC8	PC9	PC10	PC11	PC12
RF10	H	0.3823	0.2274	-0.0082	-0.0734	0.0949	-0.0221	-0.0008	-0.0219	-0.0163	0.1027	-0.126	0
RF11	H	-0.0321	-0.0809	-0.171	0.0965	-0.1083	-0.038	-0.0627	0.2374	0.064	0.129	0.0015	0
RF12	H	0.0114	-0.0376	-0.2525	0.0051	0.0838	-0.1687	0.06	-0.062	-0.1659	-0.0534	0.0883	0
RF9	H	0.2999	0.1052	0.0923	0.0562	-0.1284	0.0697	-0.0259	0.0551	0.0151	-0.1218	0.1615	0
RF1	C	-0.3082	0.3408	0.0477	-0.0962	-0.0592	0.0173	0.1613	0.0715	-0.0265	-0.0077	-0.002	0
RF2	C	-0.1667	0.1086	0.0006	-0.0917	-0.0378	-0.0899	-0.2927	-0.0979	0.0563	-0.0455	-0.0153	0
RF3	C	-0.0347	-0.0455	0.1378	0.3086	-0.0764	-0.1184	0.0586	-0.068	-0.0071	-0.0468	-0.1188	0
RF4	C	-0.1164	0.048	-0.0246	0.1821	0.2649	0.1792	-0.0296	-0.0378	0.0648	0.0299	0.0615	0
RF5	D	0.0087	-0.1885	-0.0346	-0.1263	0.0883	0.0753	0.0192	0.1251	0.0253	-0.1827	-0.1282	0
RF6	D	-0.0055	-0.1881	0.2267	-0.134	0.1058	-0.1609	0.0688	0.0139	0.0957	0.071	0.0891	0
RF7	D	-0.053	-0.1666	0.1291	-0.0498	-0.0673	0.147	-0.0667	-0.0179	-0.2372	0.0872	-0.0062	0
RF8	D	0.0143	-0.1229	-0.143	-0.0771	-0.1604	0.1095	0.1105	-0.1976	0.1318	0.038	-0.0053	0

## Sheet: l-Bulk soil-bacteria
sample	group	PC1	PC2	PC3	PC4	PC5	PC6	PC7	PC8	PC9	PC10	PC11	PC12
SF10	H	-0.0872	-0.0085	-0.4836	0.1842	0.1058	-0.0595	-0.0847	-0.0626	0.1024	-0.023	0.0418	0
SF11	H	-0.1455	0.0727	-0.0168	-0.1923	0.0314	0.2407	0.2552	0.0431	0.1692	0.0207	0.168	0
SF12	H	-0.0658	0.2384	-0.0979	-0.1984	-0.3963	-0.0615	-0.1425	-0.0038	-0.0776	0.0003	0.0278	0
SF9	H	-0.1762	0.0619	-0.0192	0.2003	0.0197	0.1203	0.1013	0.1583	-0.2739	0.1809	-0.0661	0
SF1	C	-0.0543	-0.5724	0.0261	-0.0356	-0.1703	-0.0445	-0.0087	0.065	0.0584	0.0648	-0.0286	0
SF2	C	-0.092	-0.1194	0.0236	-0.179	0.1655	0.0826	-0.0294	-0.3034	-0.2118	-0.1134	-0.0279	0
SF3	C	-0.1174	0.0465	0.0551	-0.1233	0.1793	-0.109	-0.0774	0.2946	0.0114	-0.2301	-0.0983	0
SF4	C	-0.1248	0.1109	0.1596	0.0474	0.0379	-0.3893	0.1892	-0.1247	0.0577	0.0863	0.0005	0
SF5	D	0.3724	0.0878	-0.0635	-0.0951	0.0239	0.0763	0.0604	-0.0355	0.1021	0.1015	-0.2879	0
SF6	D	0.5002	-0.037	0.0022	0.0422	0.0263	-0.0729	0.0527	0.0713	-0.1294	-0.0582	0.2195	0
SF7	D	-0.007	0.0537	0.194	0.3234	-0.1695	0.1475	0.0128	-0.0879	0.0879	-0.2204	-0.0431	0
SF8	D	-0.0024	0.0654	0.2203	0.0262	0.1463	0.0693	-0.3289	-0.0142	0.1036	0.1905	0.0943	0
