# Supplementary material for: Development of biocontrol agents for cotton verticillium wilt using microbiome analysis
Source: Research Square preprint supplement (doi:10.21203/rs.3.rs-6884856/v1), 2025-06-18
Supplement: Supplementary file 4 [file bdc7c2818434271928dd7a03.xlsx]

## Sheet: a-Root-bacteria
Sample ID	Feature	ACE	Chao1	Simpson	Shannon
EB1	624	624	624	0.9973	8.9442
EB10	602	602	602	0.9974	8.9199
EB11	671	671	671	0.9969	8.938
EB12	549	549	549	0.9973	8.8286
EB2	729	729	729	0.9979	9.2191
EB3	276	276	276	0.9938	7.7426
EB4	681	681	681	0.9979	9.1529
EB5	345	345	345	0.9953	8.1146
EB6	176	176	176	0.9867	6.8909
EB7	226	226	226	0.9902	7.3168
EB8	185	185	185	0.9827	6.7562
EB9	501	501	501	0.9971	8.6965

## Sheet: b-Rhizosphere-bacteria
Sample ID	Feature	ACE	Chao1	Simpson	Shannon
RB1	1346	1346.27	1346.33	0.997	9.6205
RB10	1356	1356.13	1356	0.9966	9.5981
RB11	1333	1333.28	1333.33	0.9961	9.474
RB12	1303	1303	1303	0.9969	9.5316
RB2	1364	1364.13	1364	0.9972	9.671
RB3	1282	1282.26	1283	0.9959	9.4879
RB4	1361	1361	1361	0.9967	9.6076
RB5	1306	1306.13	1306	0.9969	9.5679
RB6	1318	1318.27	1318.25	0.9972	9.5972
RB7	1313	1313.13	1313	0.9979	9.7119
RB8	1290	1290	1290	0.995	9.4134
RB9	1352	1352.4	1353	0.997	9.6404

## Sheet: c-Bulk soil-bacteria
Sample ID	Feature	ACE	Chao1	Simpson	Shannon
SB1	1184	1184.14	1184	0.9928	8.949
SB10	1287	1287.27	1287.2	0.9962	9.5216
SB11	1311	1311.13	1311	0.9965	9.5731
SB12	1283	1283.14	1283	0.997	9.5776
SB2	1330	1330	1330	0.9968	9.6183
SB3	1300	1300.53	1301.5	0.9966	9.531
SB4	1197	1197	1197	0.9972	9.4943
SB5	1310	1310	1310	0.997	9.6075
SB6	1112	1112.14	1112	0.9953	9.0942
SB7	1235	1235.27	1235.33	0.9968	9.4315
SB8	1199	1199.27	1199.33	0.9966	9.3107
SB9	1350	1350.4	1351.5	0.9965	9.6513

## Sheet: d-Root-fungi
Sample ID	Feature	ACE	Chao1	Simpson	Shannon
EF1	381	381	381	0.6305	2.4974
EF10	404	404	404	0.561	3.2669
EF11	436	436	436	0.7085	4.1882
EF12	436	436	436	0.699	4.0859
EF2	414	414	414	0.694	3.1767
EF3	403	403	403	0.6089	3.2253
EF4	407	407	407	0.5147	3.0958
EF5	284	284	284	0.8943	4.4058
EF6	218	218	218	0.3895	1.6313
EF7	339	339	339	0.7459	3.371
EF8	241	241	241	0.378	1.4753
EF9	401	401	401	0.7245	3.6195

## Sheet: e-Rhizosphere-fungi
Sample ID	Feature	ACE	Chao1	Simpson	Shannon
RF1	539	539	539	0.9807	7.5554
RF10	582	582	582	0.9906	7.8658
RF11	651	651	651	0.9929	8.2027
RF12	630	630	630	0.9928	8.1537
RF2	608	608.137	608	0.9917	8.0945
RF3	630	630	630	0.9917	8.097
RF4	609	609.274	610	0.9931	8.1465
RF5	606	606	606	0.9921	8.0348
RF6	568	568	568	0.9906	7.802
RF7	587	587.163	587	0.9916	7.983
RF8	606	606	606	0.9881	7.8269
RF9	595	595.138	595	0.9917	7.9648

## Sheet: f-Bulk soil-fungi
Sample ID	Feature	ACE	Chao1	Simpson	Shannon
SF1	416	416	416	0.9681	6.7768
SF10	484	484	484	0.9912	7.84
SF11	520	520	520	0.9895	7.789
SF12	467	467.376	468	0.897	6.2952
SF2	503	503	503	0.9919	7.927
SF3	540	540	540	0.9916	7.9204
SF4	506	506	506	0.9878	7.6152
SF5	475	475	475	0.9809	7.3656
SF6	355	355	355	0.9046	5.3501
SF7	459	459	459	0.9786	7.2407
SF8	498	498	498	0.9862	7.5153
SF9	522	522	522	0.9916	7.8344
