# Supplementary material for: Development of biocontrol agents for cotton verticillium wilt using microbiome analysis
Source: Research Square preprint supplement (doi:10.21203/rs.3.rs-6884856/v1), 2025-06-18
Supplement: Supplementary file 5 [file d8e290e4dd0c53ee6627941c.xlsx]

## Sheet: Figure 1
	CK	V991
incidence rate(%)	0	90
V991 group	Grade 0	Grade 1	Grade 2	Grade 3	Grade 4
plants	3	2	3	3	19
incidence rate(%)	0.9
diseqase index	77.5
CK group	Grade 0	Grade 1	Grade 2	Grade 3	Grade 4
plants	30	0	0	0	0
incidence rate(%)	0
diseqase index	0

## Sheet: Figure 6
			V991					F679
					Mean	SD				Mean	SD
			M35	Bacillus velezensis	7	0		R8	Pseudomonas koreensis	4.83	0.29
			T8	Bacillus velezensis	7	0		M7-1	Bacillus amyloliquefaciens	6	0
			R55	Pseudomonas fluorescens	8	0		M14	Digitaria exilis	7	0
			T1	Brevibacillus laterosporus	8	1.73		M20	Bacillus velezensis	7	0
			T13	Bacillus subtilis	8.33	0.58		T1	Brevibacillus laterosporus	7	1
			R19	Bacillus cereus	8.33	3.21		M19-1	Streptomyces nigrescens	7.33	0.58
			R4	Bacillus thuringiensis	9.33	2.52		R57	Bacillus toyonensis	8	0
			M20	Bacillus velezensis	9.67	0.58		M37	Bacillus amyloliquefaciens	8	0
			R23	Bacillus simplex	9.67	1.15		R23	Bacillus simplex	9	0
			R36	Bacillus cereus	10	0		M8-1	Bacillus velezensis	9.33	0.58
			M19-1	Streptomyces nigrescens	10.67	1.53		M13	Bacillus velezensis	11	0
			M7-1	Bacillus amyloliquefaciens	11.33	1.15		M11	Bacillus amyloliquefaciens	14	0
			M37	Bacillus amyloliquefaciens	11.67	0.58		M34	Bacillus velezensis	14	1
			R52	Bacillus cereus	12	0		M12	Bacillus amyloliquefaciens	14.67	1.53
			M8-1	Bacillus velezensis	13	1		M10	Bacillus velezensis	15	1
			M13	Bacillus velezensis	14	0		M9	Bacillus amyloliquefaciens	15.33	1.15
			R57	Bacillus toyonensis	20	0
			M12	Bacillus amyloliquefaciens	20.33	0.58
			M10	Bacillus velezensis	21.67	1.53
			M9	Bacillus amyloliquefaciens	22	1.73

## Sheet: Figure 7
	incedence rate %
	CK	BM7	BM8	BM9	BR7	BR8	BR9
	75	66.67	75	50	75	91.67	41.67
	75	50	83.33	58.33	75	83.33	41.67
	91.67	75	66.67	75	58.33	75	50
Average	80.5567	63.89	75	61.11	69.4433	83.3333	44.4467
Reduction rate %		11.1067	0	33.3333	0	-22.2267	44.44
	dry weight (g)
	CK	BM7	BM8	BM9	BR7	BR8	BR9
	0.4803	0.4794	0.5684	0.5782	0.5358	0.533	0.579
	0.4476	0.5804	0.54	0.6107	0.492	0.4698	0.4305
	0.5083	0.4302	0.5245	0.5169	0.5669	0.4695	0.5504
Average	0.478733	0.496667	0.5443	0.5686	0.531567	0.490767	0.519967
Reduction rate %		-0.187383	18.3427	20.3831	11.5553	10.9723	20.5497
	root length (mm)
	CK	BM7	BM8	BM9	BR7	BR8	BR9
	57.67	50.58	45	57.25	56.58	59.75	54.58
	45.25	45.75	50.25	59.92	42.67	46.08	51.5
	53.25	39.33	49.25	53.08	46.58	48.42	59.75
Average	52.0567	45.22	48.1667	56.75	48.61	51.4167	55.2767
	plant height (mm)
	CK	BM7	BM8	BM9	BR7	BR8	BR9
	57.67	50.58	45	57.25	56.58	59.75	56.25
	50.17	57.92	46.25	61.5	49.67	46.75	50.83
	53.58	50.08	46.67	46.17	56.67	54.33	55.75
Average	53.8067	52.86	45.9733	54.9733	54.3067	53.61	54.2767

## Sheet: Figure 8
	group	disease plants	incidence rate (%)		total plants of every group：10
	CK	9	0.9
		9	0.9
		8	0.8
	R	1	0.1
		1	0.1
		1	0.1
	F	4	0.4
		5	0.5
		4	0.4
